# Supplementary material for: Unravelling molecular mechanisms in the fluorescence spectra of doxorubicin in aqueous solution by femtosecond fluorescence spectroscopy
Source: Royal Society of Chemistry journal article supplement (doi:10.1039/c2cp44056c), 2012-12-21
Supplement: c2cp44056c.pdf [file c2cp44056c.pdf]

## Electronic Supplementary Information

### Unravelling molecular mechanisms in the fluorescence spectra of Doxorubicin in aqueous solution by femtosecond fluorescence spectroscopy

Pascale Changenet-Barret,<sup>\*a</sup> Thomas Gustavsson,<sup>a</sup> Dimitra Markovitsi,<sup>a</sup> Ilse Manet,<sup>\*b</sup> and Sandra Monti<sup>b</sup>

<sup>a</sup> Laboratoire Francis Perrin, CEA/DSM/IRAMIS/SPAM – CNRS URA 2453, 91191 Gif-sur-Yvette, France. Fax: + 33 169 088 707; Tel: +33 169 081 940; E-mail: pascale.changenet-barret@cea.fr

<sup>b</sup> Istituto per la Sintesi Organica e la Fotoreattività, CNR, via P. Gobetti 101, 40129 Bologna, Italy. Fax: +39 051 639 9844; Tel: +30 051 639 9808; E-mail: ilse.manet@isof.cnr.it

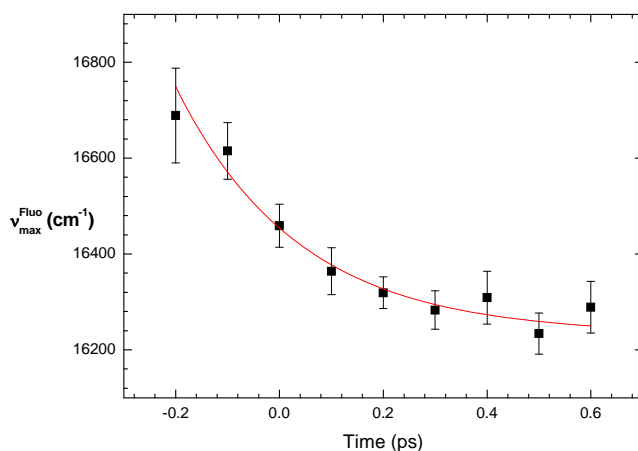

**Fig. S1.** Time-resolved shift of the fluorescence band of DOX 380  $\mu\text{M}$  DOX in 10 mM Tris buffer at pH 7.4, with 1 mM EDTA and 50 mM NaCl, after excitation at 400 nm. The kinetics trace was fitted to an exponential function with a time constant of  $0.24 \pm 0.05$  ps and an amplitude of  $221 \pm 42$   $\text{cm}^{-1}$ .

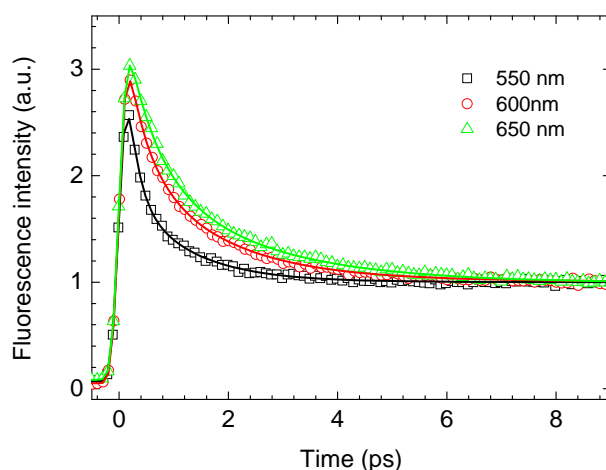

**Fig. S2** Typical total fluorescence decay of DOX (800  $\mu\text{M}$ ) in  $\text{D}_2\text{O}$ , at 550, 600 and 650 nm, after excitation at 400 nm. The fits with a three-exponential function convoluted with a Gaussian representing the instrumental response function (FWHM 280 fs) are represented by the solid lines.

| <i>800 <math>\mu\text{M}</math> DOX / <math>\text{D}_2\text{O}</math></i> | <i><math>a_1</math></i><br><i><math>\tau_1</math></i> | <i><math>a_2</math></i><br><i><math>\tau_2</math></i> | <i><math>a_3</math></i><br><i><math>\tau_3</math></i> |
|---------------------------------------------------------------------------|-------------------------------------------------------|-------------------------------------------------------|-------------------------------------------------------|
| <b>550 nm</b>                                                             | 0.51 $\pm$ 0.02<br>433 $\pm$ 24 fs                    | 0.24 $\pm$ 0.01<br>2.6 $\pm$ 0.1 ps                   | 0.25 $\pm$ 0.01<br>1 ns                               |
| <b>600 nm</b>                                                             | 0.39 $\pm$ 0.01<br>488 $\pm$ 31 fs                    | 0.35 $\pm$ 0.01<br>2.22 $\pm$ 0.07 ps                 | 0.26 $\pm$ 0.01<br>1 ns                               |
| <b>650 nm</b>                                                             | 0.46 $\pm$ 0.01<br>721 $\pm$ 39 fs                    | 0.33 $\pm$ 0.01<br>3.1 $\pm$ 0.1 ps                   | 0.20 $\pm$ 0.02<br>1 ns                               |

**Table S11.** Time constants and amplitudes obtained from the individual fits of the fluorescence decays measured for 800  $\mu\text{M}$  DOX in  $\text{D}_2\text{O}$ . Decays were fitted using a three-exponential function where the longest time was fixed to 1 ns.

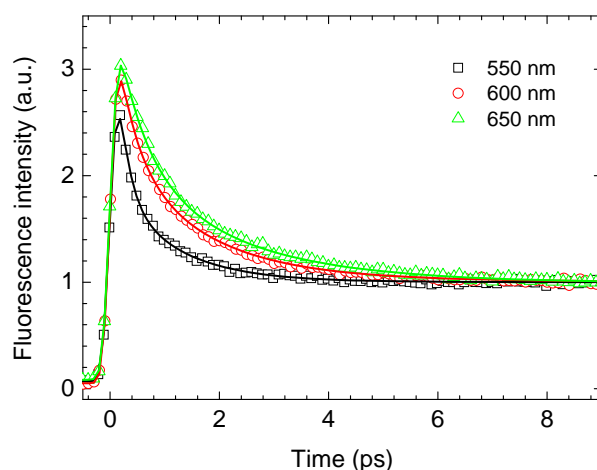

**Fig. S3** Typical total fluorescence decay of DOX (800  $\mu\text{M}$ ) in  $\text{H}_2\text{O}$ , at 550, 600 and 650 nm, after excitation at 400 nm. The fits with a three-exponential function convoluted with a Gaussian representing the instrumental response function (FWHM 280 fs) are represented by the solid lines.

| <b>800 <math>\mu\text{M}</math> DOX / <math>\text{H}_2\text{O}</math></b> | <b><math>a_1</math></b><br><b><math>\tau_1</math></b> | <b><math>a_2</math></b><br><b><math>\tau_2</math></b> | <b><math>a_3</math></b><br><b><math>\tau_3</math></b> |
|---------------------------------------------------------------------------|-------------------------------------------------------|-------------------------------------------------------|-------------------------------------------------------|
| <b>550 nm</b>                                                             | 0.51 $\pm$ 0.05<br>198 $\pm$ 18 fs                    | 0.24 $\pm$ 0.06<br>1.09 $\pm$ 0.05 ps                 | 0.25 $\pm$ 0.01<br>1 ns                               |
| <b>600 nm</b>                                                             | 0.36 $\pm$ 0.04<br>362 $\pm$ 28 fs                    | 0.36 $\pm$ 0.05<br>1.53 $\pm$ 0.05 ps                 | 0.28 $\pm$ 0.01<br>1 ns                               |
| <b>650 nm</b>                                                             | 0.39 $\pm$ 0.04<br>523 $\pm$ 32 fs                    | 0.35 $\pm$ 0.05<br>1.97 $\pm$ 0.07 ps                 | 0.26 $\pm$ 0.01<br>1 ns                               |

**Table SI2.** Time constants and amplitudes obtained from the individual fits of the fluorescence decays measured for 800  $\mu\text{M}$  DOX in  $\text{H}_2\text{O}$ . Decays were fitted using a three-exponential function where the longest time was fixed to 1 ns.
